# Supplementary material for: Fluorescent probes for “off–on” sensitive and selective detection of mercury ions and l-cysteine based on graphitic carbon nitride nanosheets
Source: Royal Society of Chemistry journal article supplement (doi:10.1039/c4tc02394c), 2014-12-31
Supplement: c4tc02394c1.pdf [file c4tc02394c1.pdf]

## *Supporting Information*

### **Fluorescent probes for “off-on” sensitive and selective detection of mercury ions and L-cysteine based on graphitic carbon nitride nanosheets**

Hanqiang Zhang<sup>a</sup>, Yihong Huang<sup>a</sup>, Shirong Hu<sup>a,b\*</sup>, Qitong Huang<sup>a,c</sup>, Chan Wei<sup>a</sup>, Wuxiang Zhang<sup>a</sup>,

Lianping Kang<sup>a</sup>, Zhouyi Huang<sup>a</sup>, Pingwang Dai<sup>d</sup>, Aiyou Hao<sup>b\*</sup>

<sup>a</sup> College of Chemistry and Environment, Minnan Normal University, Zhangzhou 363000, P.R. China.

<sup>b</sup> School of Chemistry & Chemical Engineering, Shandong University, Jinan 250100, P.R. China.

<sup>c</sup> Department of Food and Biological Engineering, Zhangzhou Institute of Technology, Zhangzhou 363000, P.R. China.

<sup>d</sup> Zhangzhou Products Quality Supervision Institute, Zhangzhou 363000, P.R. China.

---

\*Corresponding author Fax: +86 596 2528075; Tel.: +86 596 2528075

E-mail: Hushirong6666@163.com (S Hu)

\*Corresponding author Fax: + 86 531-8564464; Tel: +86 531-88363306

E-mail address: haoay@sdu.edu.cn (A Hao)

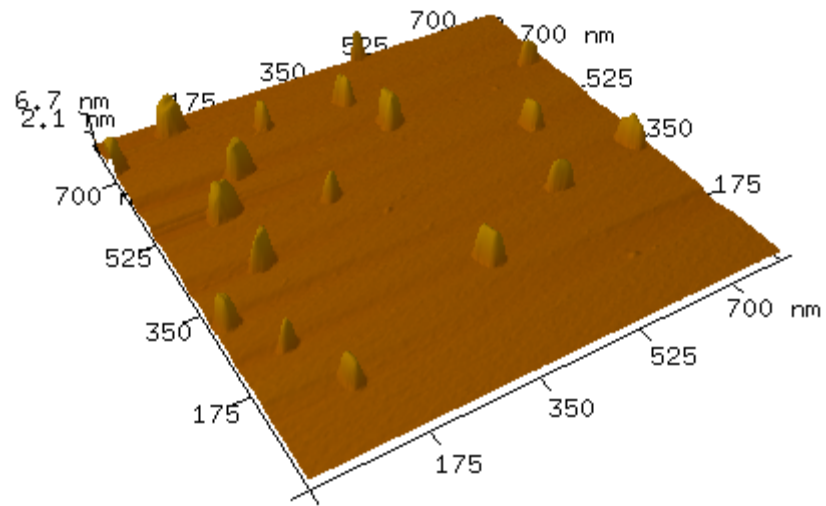

**Fig. S1** The AFM 3D image of surface morphology of CNNS.

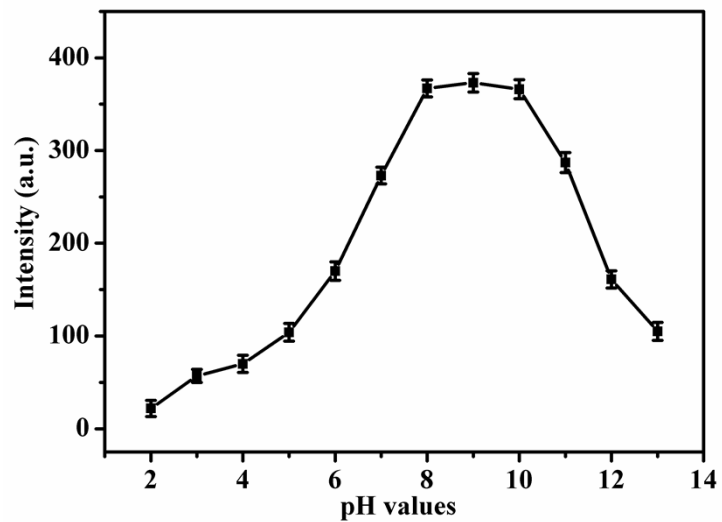

**Fig. S2** The fluorescence intensity of CNNS with various pH values (from 2.0 to 13.0).

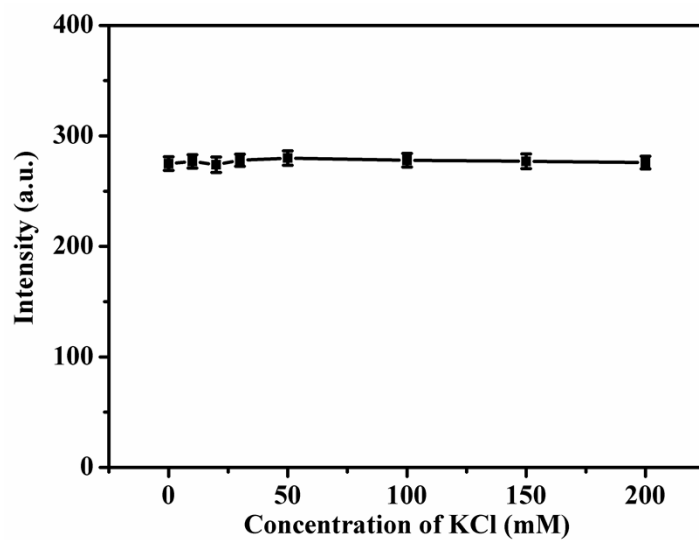

**Fig. S3** The fluorescence intensity of CNNS with different KCl concentrations (from 0 to 200 mM).

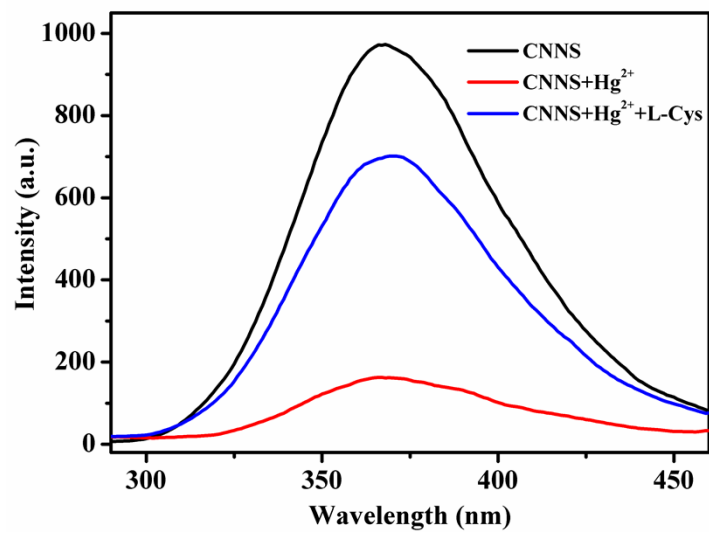

**Fig. S4** Fluorescence spectra of CNNS, CNNS + Hg<sup>2+</sup> and CNNS + Hg<sup>2+</sup> + L-Cys.

**Table S1** Experimental results for determination of Hg<sup>2+</sup> and L-Cys in practical samples.

| Sample     | Add Hg <sup>2+</sup> (μM) | Add L-Cys (μM) | Found (μM) | Recover (%) | RSD (%) |
|------------|---------------------------|----------------|------------|-------------|---------|
| Tap water  | 1.0                       | 0              | 0.97       | 97.0        | 0.79    |
|            | 2.0                       | 0              | 1.96       | 98.0        | 1.24    |
|            | 3.0                       | 0              | 3.03       | 101.0       | 1.67    |
| Well water | 1.0                       | 0              | 1.02       | 102.0       | 0.96    |
|            | 2.0                       | 0              | 1.97       | 98.5        | 1.49    |
|            | 3.0                       | 0              | 2.96       | 98.7        | 1.86    |
| Tap water  | 0                         | 1.0            | 1.03       | 103.0       | 0.84    |
|            | 0                         | 2.0            | 2.06       | 103.0       | 1.66    |
|            | 0                         | 3.0            | 3.06       | 102.0       | 1.24    |
| Well water | 0                         | 1.0            | 1.03       | 103.0       | 1.51    |
|            | 0                         | 2.0            | 1.97       | 98.5        | 1.68    |
|            | 0                         | 3.0            | 2.92       | 97.3        | 0.83    |
